# Supplementary material for: Deciphering the evolution of the functional genes and microbial community of the combined partial nitritation-anammox process with nitrate build-up and its in situ restoration
Source: Royal Society of Chemistry journal article supplement (doi:10.1039/c6ra23865c), 2016-01-01
Supplement: c6ra23865c1.pdf [file c6ra23865c1.pdf]

**Deciphering the evolution of the functional genes and microbial community of the combined partial nitrification-anammox process with the nitrate build-up and its in-situ restoration**

Yuanyue Wang <sup>a,b</sup>, Hongyan Wang <sup>a,b</sup>, Junya Zhang <sup>a,b</sup>, Li Yao <sup>c</sup>, Yuansong Wei <sup>a, b, d, \*</sup>

<sup>a</sup> State Key Joint Laboratory of Environmental Simulation and Pollution Control, Research Center for Eco-Environmental Sciences, Chinese Academy of Sciences, Beijing 100085, China

<sup>b</sup> University of Chinese Academy of Sciences, Beijing 100049, China

<sup>c</sup> School of Life Sciences, University of Science and Technology of China, Hefei 230026, China

<sup>d</sup> Institute of Energy, Jiangxi Academy of Sciences, Nanchang 330096, China.

**\*Corresponding author:**

**Yuansong Wei**

Tel.: +86-10-62849690; fax: +86-10-62849690

E-mail address: yswei@rcees.ac.cn

Postal address: Research Center for Eco-Environmental Sciences, Chinese Academy of Sciences,  
P.O. Box 2871, Beijing 100085, China.

## Figure Captions

**Fig. S1.** The pH profile in SBR through all the stages. The pH of initial aeration represented the pH value in each SBR cycle when the feeding was finished and aeration initiated.

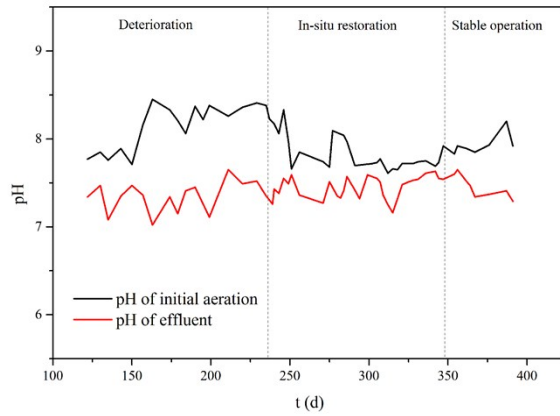

**Fig. S2.** The evolution of activities of AOB, NOB and anammox and the nitrite accumulation rate during the stages of deterioration, in-situ restoration and recovered stable operation.

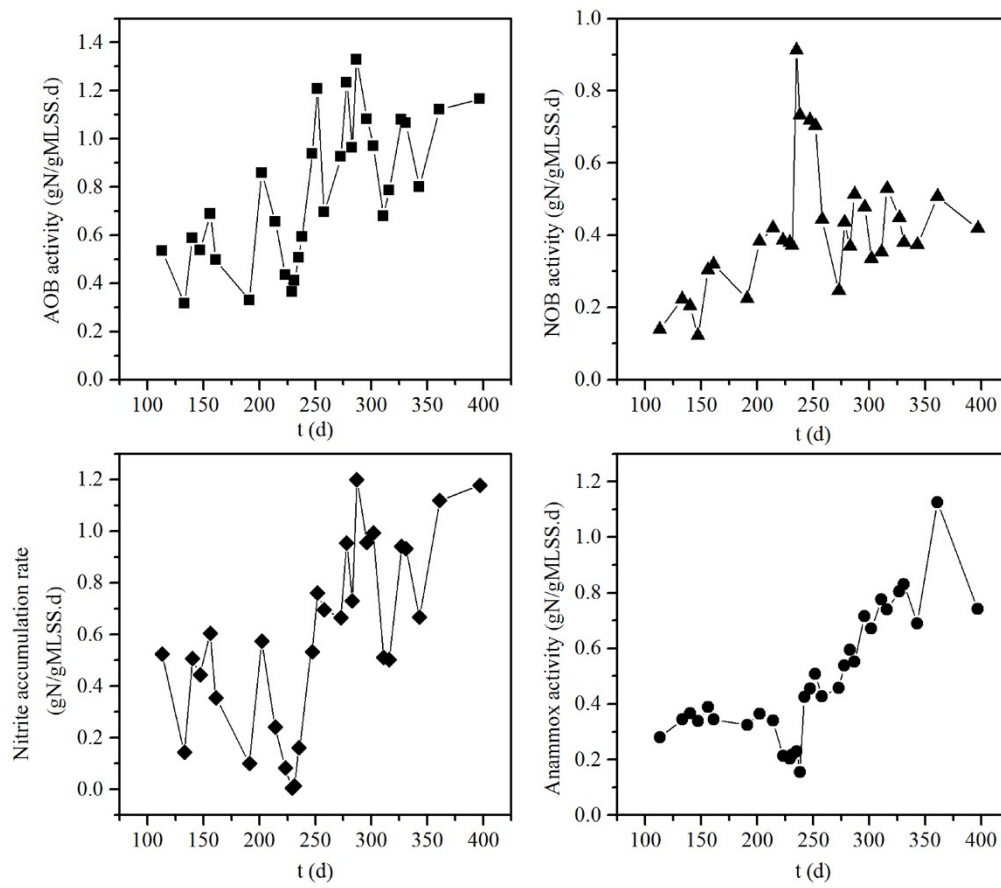

**Fig. S3.** The simulation of the recovery of NRR by the modified Boltzmann model. The initial of the horizontal axis was corresponding to the start point of the in-situ restoration.

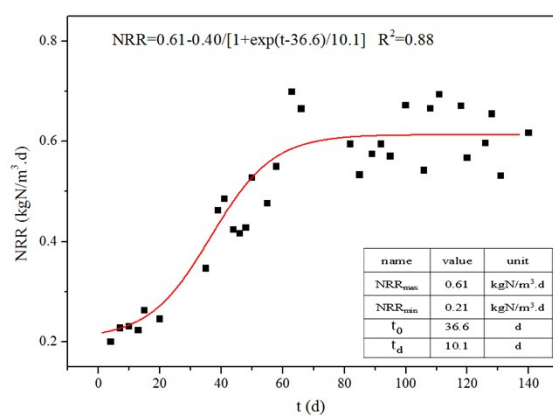

**Fig. S4.** The fitting curve of the *nrxA* gene abundance during the in-situ restoration and the recovered stable operation. The initial of the horizontal axis was corresponding to the day 230 with the maximum *nrxA* abundance in the whole operation of CPNA process. The vertical axis represented the gene copy concentration (copies gMLSS<sup>-1</sup>).

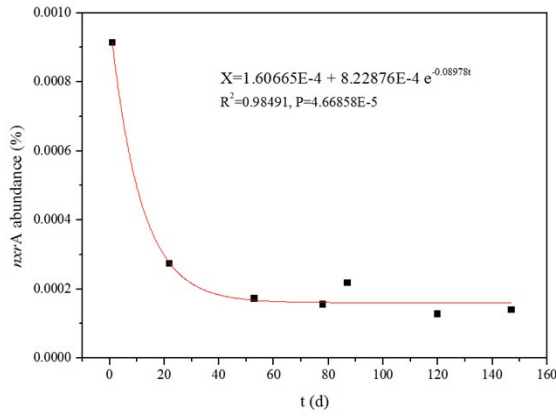

**Fig. S5.** The fitting curves of the exponential growth of the functional genes during the second in-situ restoration stage with  $\text{NH}_2\text{OH}$  dosing and SRT control and the recovered stable operation. The initial of the horizontal axis was corresponding to the start point of the second stage of in-situ restoration. The vertical axis represented the gene copy concentration ( $\text{copies gMLSS}^{-1}$ ).

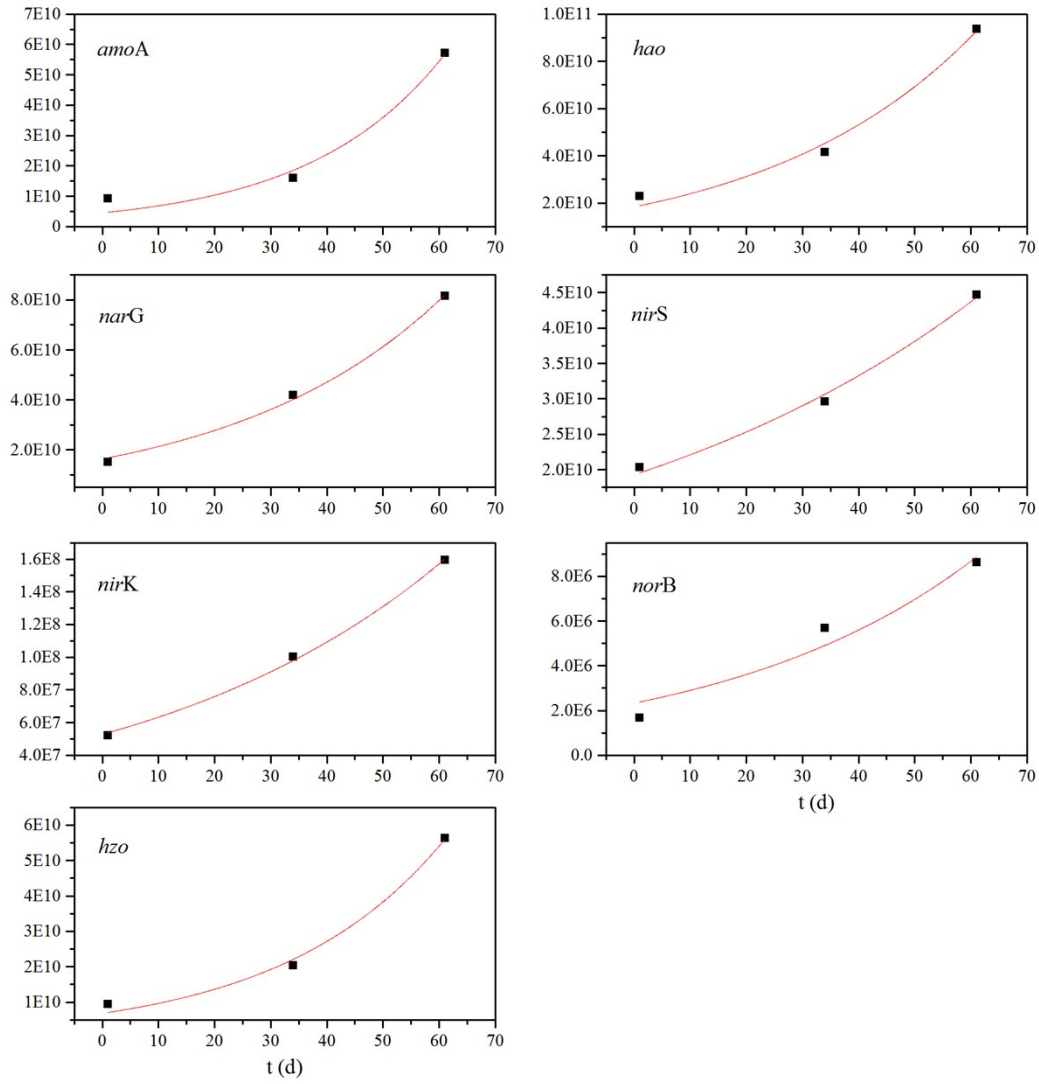

**Fig. S6.** Rarefaction curves for each sample.

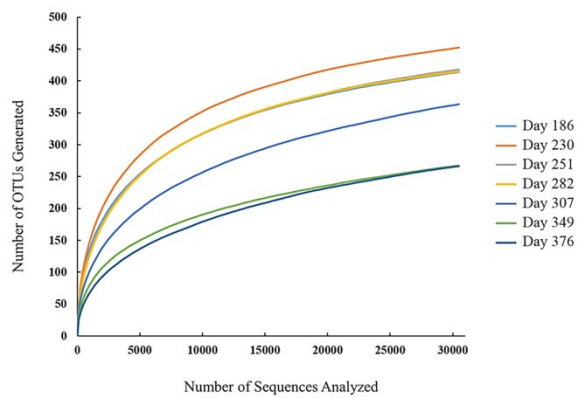

**Fig. S7.** Evolution of microbial community at phylum level.

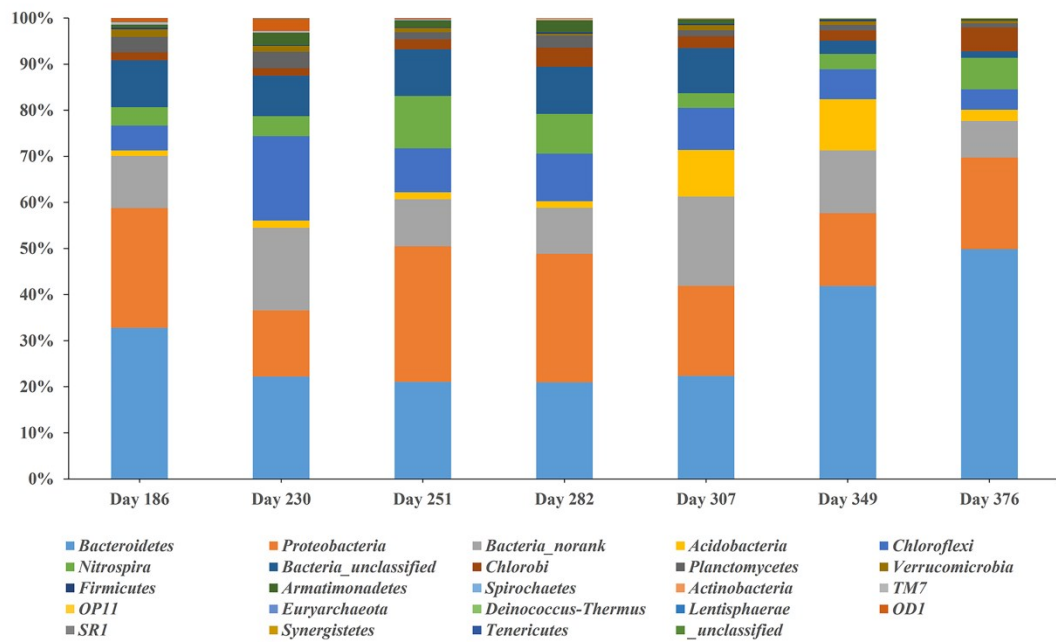

**Table S1** The primers sequences, expected amplicon size, and annealing temperature for each target gene used in this study.

| Target genes | Primer   | Sequences (5'-3')       | Amplicon size(bp) | Annealing temp. (°C) | Reference |
|--------------|----------|-------------------------|-------------------|----------------------|-----------|
| <i>amoA</i>  | amoA-F   | GGGGTTTCTACTGGTGGT      | 491               | 60                   | 1         |
|              | amoA-R   | CCCCTCKGSAAAGCCTTCTTC   |                   |                      |           |
| <i>hao</i>   | Hao1F    | TGAGCCAGTCCAACGTGCAT    | 70                | 55                   | 2         |
|              | Hao1R    | AAGGCAACAACCCTGCCTCA    |                   |                      |           |
| <i>nxrA</i>  | nxrA-F   | CAGACCGACGTGTGCGAAAG    | 322               | 58                   | 3         |
|              | nxrA-R   | TCYACAAGGAACGGAAGGTC    |                   |                      |           |
| <i>narG</i>  | 1960m2F  | TAYGTSGGGCAGGARAAACTG   | 110               | 50                   | 4         |
|              | 2050m2R  | CGTAGAAGAAGCTGGTGCTGTT  |                   |                      |           |
| <i>nirS</i>  | cd3AF    | G TSAACG TSAAGGARACSSG  | 425               | 58                   | 5         |
|              | R3cd     | GASTTCGGRTGSGTCTTGA     |                   |                      |           |
| <i>nirK</i>  | nirK-1F  | GGMATGGTKCCSTGGCA       | 515               | 56                   | 6         |
|              | nirK-5R  | GCCTCGATCAGRTRRTGG      |                   |                      |           |
| <i>norB</i>  | cnorB2F  | GACAAGNNNTACTGGTGGT     | 389               | 55                   | 7         |
|              | cnorB6R  | GAANCCCCANACNCCNGC      |                   |                      |           |
| <i>nosZ</i>  | nosZ2F   | CGCRACGGCAASAAGGTSMSSTG | 264               | 55                   | 8         |
|              | nosZ2R   | CAKRTGCAKSGCRTGGCAGAA   |                   |                      |           |
| <i>hzo</i>   | hzocl1F1 | TGYAAGACYTG YCAYTGG     | 470               | 55                   | 9         |
|              | hzocl1R2 | ACTCCAGATRTGCTGACC      |                   |                      |           |
| 16S rRNA     | 1369F    | CGGTGAATACGTTTCYCGG     | 128               | 55                   | 10        |
|              | 1492R    | GGWTACCTTGTTACGACTT     |                   |                      |           |

Table S2 Pearson correlation analysis of top 10 genera and N-transformation genes along with the nitrate build-up and in-situ restoration.

|                                            | <i>amoA</i>    | <i>hao</i>    | <i>nxA</i>    | <i>narG</i> | <i>nirS</i>    | <i>nirK</i>   | <i>norB</i>    | <i>nosZ</i>    | <i>hzo</i>     |
|--------------------------------------------|----------------|---------------|---------------|-------------|----------------|---------------|----------------|----------------|----------------|
| <i>Gp4</i>                                 | -0.353         | -0.280        | -0.523        | -0.092      | -0.125         | -0.665        | -0.323         | -0.217         | -0.050         |
| <i>Gp3</i>                                 | 0.301          | 0.266         | 0.523         | -0.320      | 0.121          | <b>0.780*</b> | 0.283          | 0.535          | -0.238         |
| <i>Chthonomonas</i>                        | -0.306         | -0.406        | <b>0.755*</b> | 0.002       | -0.575         | 0.291         | -0.199         | 0.590          | -0.525         |
| <i>Armatimonadetes gp5</i>                 | 0.616          | <b>0.791*</b> | -0.329        | -0.317      | <b>0.768*</b>  | 0.612         | -0.158         | 0.464          | 0.202          |
| <i>Wandonia</i>                            | -0.150         | -0.176        | -0.292        | -0.470      | -0.063         | -0.361        | -0.114         | 0.171          | -0.208         |
| <i>Lewinella</i>                           | 0.056          | 0.075         | 0.303         | -0.681      | 0.116          | 0.457         | <b>0.791*</b>  | 0.074          | -0.363         |
| <i>Haliscomenobacter</i>                   | 0.025          | -0.004        | -0.566        | 0.517       | 0.149          | -0.746        | -0.382         | -0.390         | 0.588          |
| <i>Litorilinea</i>                         | 0.271          | 0.426         | 0.131         | -0.549      | 0.501          | 0.589         | 0.091          | 0.712          | -0.166         |
| <i>Ignavibacterium</i>                     | 0.615          | 0.430         | -0.179        | -0.290      | -0.160         | <b>0.802*</b> | -0.353         | 0.189          | -0.239         |
| <i>Nitrospira</i>                          | <b>0.790*</b>  | 0.582         | -0.287        | 0.005       | 0.001          | 0.739         | -0.268         | -0.096         | 0.100          |
| <i>Parcubacteria genera incertae sedis</i> | -0.513         | -0.450        | <b>0.826*</b> | -0.196      | -0.244         | 0.061         | 0.024          | <b>0.834*</b>  | -0.492         |
| <i>Phycisphaera</i>                        | -0.809*        | -0.724        | <b>0.867*</b> | -0.243      | -0.468         | -0.100        | 0.491          | 0.277          | -0.641         |
| <i>Candidatus Kuenenia</i>                 | -0.520         | -0.483        | -0.379        | -0.095      | -0.342         | -0.722        | -0.212         | -0.313         | -0.188         |
| <i>Nitrosomonas</i>                        | <b>0.933**</b> | <b>0.766*</b> | -0.611        | 0.215       | 0.350          | 0.449         | -0.191         | -0.387         | 0.541          |
| <i>Comamonas</i>                           | 0.228          | 0.188         | 0.274         | -0.433      | 0.108          | 0.550         | <b>0.769*</b>  | -0.125         | -0.189         |
| <i>Chondromyces</i>                        | -0.228         | -0.260        | -0.289        | -0.445      | -0.162         | -0.420        | -0.177         | 0.150          | -0.259         |
| <i>Byssovorax</i>                          | 0.393          | 0.148         | -0.356        | 0.411       | -0.236         | 0.022         | -0.033         | <b>-0.775*</b> | 0.316          |
| <i>Bacteriovorax</i>                       | -0.230         | -0.222        | 0.047         | -0.431      | -0.235         | 0.063         | 0.709          | -0.541         | -0.373         |
| <i>Arcobacter</i>                          | 0.540          | 0.325         | -0.213        | -0.272      | -0.290         | 0.713         | -0.201         | -0.095         | -0.266         |
| <i>Subdivision3 genera incertae sedis</i>  | -0.423         | -0.599        | 0.691         | -0.362      | <b>-0.827*</b> | 0.243         | 0.160          | 0.270          | <b>-0.806*</b> |
| <i>Opitutus</i>                            | -0.454         | -0.484        | -0.392        | -0.315      | -0.154         | -0.373        | <b>0.922**</b> | -0.288         | -0.208         |

\* Correlation is significant at the 0.05 level (2-tailed).

\*\* Correlation is significant at the 0.01 level (2-tailed).



## References:

1. J. H. Rotthauwe, K. P. Witzel and W. Liesack, *Appl. Environ. Microbiol.*, 1997, **63**, 4704-4712.
2. R. Yu, M. J. Kampschreur, M. C. M. v. Loosdrecht and K. Chandran, *Environmental science & technology*, 2010, **44**, 1313-1319.
3. W. Zhi and G. Ji, *Water Res.*, 2014, **64**, 32-41.
4. J. C. Lopez-Gutierrez, S. Henry, S. Hallet, F. Martin-Laurent, G. Catroux and L. Philippot, *J Microbiol Methods*, 2004, **57**, 399-407.
5. H. Lu, K. Chandran and D. Stensel, *Water Res.*, 2014, **64**, 237-254.
6. G. Braker, A. Fesefeldt and K.-P. Witzel, *Appl. Environ. Microbiol.*, 1998, **64**, 3769-3775.
7. G. Braker and J. M. Tiedje, *Appl. Environ. Microbiol.*, 2003, **69**, 3476-3483.
8. S. Henry, D. Bru, B. Stres, S. Hallet and L. Philippot, *Appl. Environ. Microbiol.*, 2006, **72**, 5181-5189.
9. M. C. Schmid, A. B. Hooper, M. G. Klotz, D. Woebken, P. Lam, M. M. M. Kuypers, A. Pommerening-Roeser, H. J. M. op den Camp and M. S. M. Jetten, *Environ. Microbiol.*, 2008, **10**, 3140-3149.
10. M. T. Suzuki, L. T. Taylor and E. F. DeLong, *Appl. Environ. Microbiol.*, 2000, **66**, 4605-4614.
